# Supplementary material for: Two luminescent lanthanide–organic frameworks containing bithiophene groups for the selective detection of nitrobenzene and Fe3+
Source: Royal Society of Chemistry journal article supplement (doi:10.1039/c8ce00530c), 2018-01-01
Supplement: c8ce00530c1.pdf [file c8ce00530c1.pdf]

*Supporting Information for*

**Two luminescent lanthanide-organic frameworks containing bithiophene groups for the selective detection of nitrobenzene and Fe<sup>3+</sup>**

Ai-Na Dou,<sup>‡</sup> Li-Bo Yang,<sup>‡</sup> Xiao-Dan Fang, Qi Yin, Mao-Dong Li, Ju Li, Mei-Yan Wang, Ai-Xin Zhu\*  
and Quan-Qing Xu\*

*Faculty of Chemistry and Chemical Engineering, Yunnan Normal University, Kunming 650500, China.*

E-mail: zaxchem@126.com (A.-X. Zhu); qqxu@ynnu.edu.cn (Q.-Q. Xu).

<sup>‡</sup> These authors contributed equally to this work.

**Table S1**Selected bond lengths(Å) and angles(°) for **1**.

|                     |             |                     |            |
|---------------------|-------------|---------------------|------------|
| Eu(1)-O(1)          | 2.357(3)    | Eu(1)-O(2)#1        | 2.364(3)   |
| Eu(1)-O(5)          | 2.381(3)    | Eu(1)-O(6)#1        | 2.340(3)   |
| Eu(1)-O(9)          | 2.503(3)    | Eu(1)-O(10)         | 2.430(3)   |
| Eu(1)-O(13)         | 2.453(3)    | Eu(1)-O(16)         | 2.392(3)   |
| Eu(2)-O(3)#2        | 2.353(3)    | Eu(2)-O(4)#5        | 2.391(3)   |
| Eu(2)-O(7)#3        | 2.362(2)    | Eu(2)-O(8)#4        | 2.364(3)   |
| Eu(2)-O(11)         | 2.478(3)    | Eu(2)-O(12)         | 2.456(3)   |
| Eu(2)-O(14)         | 2.427(3)    | Eu(2)-O(15)         | 2.422(3)   |
|                     |             |                     |            |
| O(1)-Eu(1)-O(2)#1   | 123.46(10)  | O(1)-Eu(1)-O(5)     | 80.17(10)  |
| O(1)-Eu(1)-O(9)     | 135.21(9)   | O(1)-Eu(1)-O(10)    | 91.96(10)  |
| O(1)-Eu(1)-O(13)    | 143.18(11)  | O(1)-Eu(1)-O(16)    | 74.03(12)  |
| O(2)#1-Eu(1)-O(5)   | 75.07(10)   | O(2)#1-Eu(1)-O(9)   | 79.74(10)  |
| O(2)#1-Eu(1)-O(10)  | 132.29(10)  | O(2)#1-Eu(1)-O(13)  | 77.22(11)  |
| O(2)#1-Eu(1)-O(16)  | 141.79(10)  | O(5)-Eu(1)-O(9)     | 144.45(9)  |
| O(5)-Eu(1)-O(10)    | 148.47 (10) | O(5)-Eu(1)-O(13)    | 76.63(11)  |
| O(5)-Eu(1)-O(16)    | 75.48(10)   | O(6)#1-Eu(1)-O(1)   | 73.37(10)  |
| O(6)#1-Eu(1)-O(2)#1 | 78.85(9)    | O(6)#1-Eu(1)-O(5)   | 122.69(10) |
| O(6)#1-Eu(1)-O(9)   | 75.26(10)   | O(6)#1-Eu(1)-O(10)  | 83.03(10)  |
| O(6)#1-Eu(1)-O(13)  | 143.46(11)  | O(6)#1-Eu(1)-O(16)  | 138.41(10) |
| O(10)-Eu(1)-O(9)    | 52.96(9)    | O(10)-Eu(1)-O(13)   | 93.10(11)  |
| O(13)-Eu(1)-O(9)    | 73.61(11)   | O(16)-Eu(1)-O(9)    | 112.81(12) |
| O(16)-Eu(1)-O(10)   | 73.00(11)   | O(16)-Eu(1)-O(13)   | 72.71(12)  |
| O(3)#2-Eu(2)-O(4)#5 | 123.30(10)  | O(3)#2-Eu(2)-O(7)#3 | 78.95(9)   |
| O(3)#2-Eu(2)-O(8)#4 | 76.96(10)   | O(3)#2-Eu(2)-O(11)  | 128.89(10) |
| O(3)#2-Eu(2)-O(12)  | 77.84(10)   | O(3)#2-Eu(2)-O(14)  | 78.81(9)   |
| O(3)#2-Eu(2)-O(15)  | 143.82(9)   | O(4)#5-Eu(2)-O(11)  | 92.12(9)   |
| O(4)#5-Eu(2)-O(12)  | 139.42(9)   | O(4)#5-Eu(2)-O(14)  | 139.23(9)  |
| O(4)#5-Eu(2)-O(15)  | 73.44(9)    | O(7)#3-Eu(2)-O(4)#5 | 73.84(9)   |
| O(7)#3-Eu(2)-O(8)#4 | 122.24(10)  | O(7)#3-Eu(2)-O(11)  | 77.46(9)   |
| O(7)#3-Eu(2)-O(12)  | 77.94       | O(7)#3-Eu(2)-O(14)  | 146.91(10) |
| O(7)#3-Eu(2)-O(15)  | 136.61(9)   | O(8)#4-Eu(2)-O(4)#5 | 77.25(9)   |
| O(8)#4-Eu(2)-O(11)  | 152.41(9)   | O(8)#4-Eu(2)-O(12)  | 143.25(9)  |
| O(8)#4-Eu(2)-O(14)  | 75.54(10)   | O(8)#4-Eu(2)-O(15)  | 76.50(10)  |
| O(12)-Eu(2)-O(11)   | 53.21(9)    | O(14)-Eu(2)-O(11)   | 98.19(10)  |
| O(14)-Eu(2)-O(12)   | 73.65(10)   | O(15)-Eu(2)-O(11)   | 76.07(10)  |
| O(15)-Eu(2)-O(12)   | 111.14(10)  | O(15)-Eu(2)-O(14)   | 71.07(10)  |

Symmetry codes: #1: -x+1,-y+1,-z; #2: -x+2,-y+1,-z+1; #3: -x+1,-y+1,-z+1; #4: -x+1,-y,-z+1.

**Table S2**Selected bond lengths(Å) and angles(°) for **2**.

|                       |            |                      |            |
|-----------------------|------------|----------------------|------------|
| Tb(1)-O(1)            | 2.457(3)   | Tb(1)-O(1A)          | 2.403(3)   |
| Tb(1)-O(1B)           | 2.419(3)   | Tb(1)-O(2)           | 2.432(3)   |
| Tb(1)-O(5)            | 2.337(3)   | Tb(1)-O(6)#3         | 2.356(3)   |
| Tb(1)-O(11)#1         | 2.339(3)   | Tb(1)-O(12)#2        | 2.345(3)   |
| Tb(2)-O(1C)           | 2.427(3)   | Tb(2)-O(1D)          | 2.41(2)    |
| Tb(2)-O(1D')          | 2.377(11)  | Tb(2)-O(3)#5         | 2.467(3)   |
| Tb(2)-O(4)#5          | 2.433(3)   | Tb(2)-O(7)#4         | 2.330(3)   |
| Tb(2)-O(8)            | 2.340(3)   | Tb(2)-O(9)           | 2.360(3)   |
| Tb(2)-O(10)#4         | 2.315(3)   |                      |            |
| O(1A)-Tb(1)-O(1)      | 75.30(11)  | O(1A)-Tb(1)-O(1B)    | 71.19(13)  |
| O(1A)-Tb(1)-O(2)      | 110.80(12) | O(1B)-Tb(1)-O(1)     | 98.56(12)  |
| O(1B)-Tb(1)-O(2)      | 73.84(12)  | O(2)-Tb(1)-O(1)      | 53.63(11)  |
| O(5)-Tb(1)-O(1)       | 129.50(10) | O(5)-Tb(1)-O(1A)     | 143.87(12) |
| O(5)-Tb(1)-O(1B)      | 78.49(12)  | O(5)-Tb(1)-O(2)      | 77.96(11)  |
| O(5)-Tb(1)-O(6)#3     | 123.22(11) | O(5)-Tb(1)-O(11)     | 79.31(11)  |
| O(5)-Tb(1)-O(12)#2    | 76.90(11)  | O(6)#3-Tb(1)-O(1)    | 91.65(11)  |
| O(6)#3-Tb(1)-O(1A)    | 73.82(12)  | O(6)#3-Tb(1)-O(1B)   | 139.50(11) |
| O(6)#3-Tb(1)-O(2)     | 139.15(11) | O(11)#1-Tb(1)-O(1)   | 77.39(11)  |
| O(11)#1-Tb(1)-O(1A)   | 136.28(12) | O(11)#1-Tb(1)-O(1B)  | 146.94(12) |
| O(11)#1-Tb(1)-O(2)    | 77.78(12)  | O(11)#1-Tb(1)-O(6)#3 | 73.54(11)  |
| O(11)#1-Tb(1)-O(12)#2 | 122.43(11) | O(12)#2-Tb(1)-O(1)   | 151.92(11) |
| O(12)#2-Tb(1)-O(1A)   | 76.83(12)  | O(12)#2-Tb(1)-O(1B)  | 75.41(12)  |
| O(12)#2-Tb(1)-O(2)    | 143.42(12) | O(12)#2-Tb(1)-O(6)#3 | 77.35(11)  |
| O(1C)-Tb(2)-O(3)#5    | 74.39(13)  | O(1C)-Tb(2)-O(4)#5   | 94.35(13)  |
| O(1D)-Tb(2)-O(1C)     | 72.4(9)    | O(1D)-Tb(2)-O(3)#5   | 117.8(6)   |
| O(1D)-Tb(2)-O(4)#5    | 78.6(6)    | O(1D')-Tb(2)-O(1C)   | 71.1(6)    |
| O(1D')-Tb(2)-O(1D)    | 9.0(8)     | O(1D')-Tb(2)-O(3)#5  | 109.3(4)   |
| O(1D')-Tb(2)-O(4)#5   | 70.1(4)    | O(4)#5-Tb(2)-O(3)#5  | 53.40(11)  |
| O(7)#4-Tb(2)-O(1C)    | 142.15(13) | O(7)#4-Tb(2)-O(1D)   | 72.0(8)    |
| O(7)#4-Tb(2)-O(1D')   | 75.6(6)    | O(7)#4-Tb(2)-O(3)#5  | 135.08(11) |
| O(7)#4-Tb(2)-O(4)#5   | 90.81(12)  | O(7)#4-Tb(2)-O(8)    | 123.92(12) |
| O(7)#4-Tb(2)-O(9)     | 80.21(12)  | O(8)-Tb(2)-O(1C)     | 78.07(13)  |
| O(8)-Tb(2)-O(1D)      | 139.2(8)   | O(8)-Tb(2)-O(1D')    | 143.9(5)   |
| O(8)-Tb(2)-O(3)#5     | 79.11(11)  | O(8)-Tb(2)-O(4)#5    | 131.86(11) |
| O(8)-Tb(2)-O(9)       | 75.46(11)  | O(9)-Tb(2)-O(1C)     | 76.43(12)  |
| O(9)-Tb(2)-O(1D)      | 70.8(6)    | O(9)-Tb(2)-O(1D')    | 79.3(4)    |
| O(9)-Tb(2)-O(3)#5     | 144.51(12) | O(9)-Tb(2)-O(4)#5    | 149.37(12) |
| O(10)#4-Tb(2)-O(1C)   | 144.42(13) | O(10)#4-Tb(2)-O(1D)  | 139.5(9)   |
| O(10)#4-Tb(2)-O(1D')  | 137.2(6)   | O(10)#4-Tb(2)-O(3)#5 | 74.96(13)  |
| O(10)#4-Tb(2)-O(4)#5  | 81.50(12)  | O(10)#4-Tb(2)-O(7)#4 | 73.41(12)  |
| O(10)#4-Tb(2)-O(8)    | 78.79(12)  | O(10)#4-Tb(2)-O(9)   | 122.70(12) |

Symmetry codes: #1: -x+1,-y+1,-z; #2: -x+2,-y+1,-z+1; #3: -x+1,-y+1,-z+1; #4: -x+1,-y,-z+1.

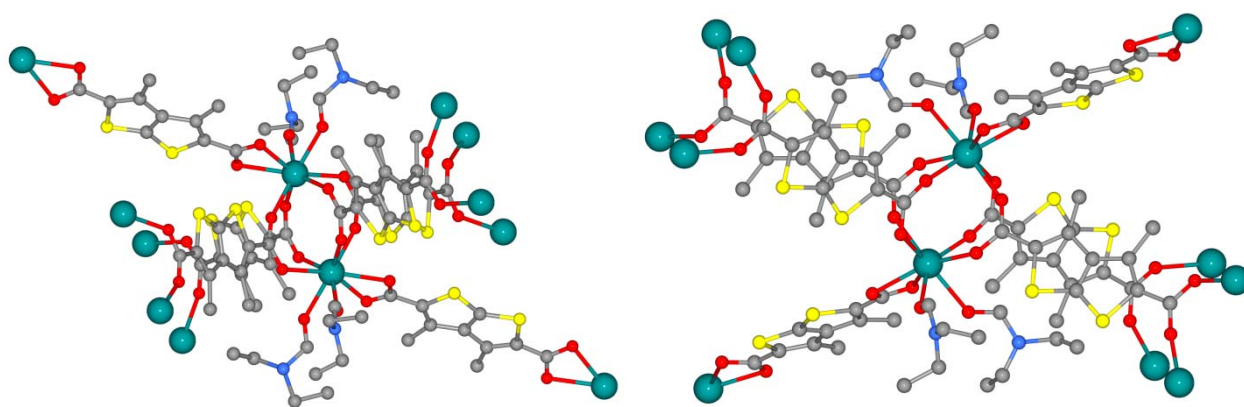

**Fig. S1** The paddle-wheel secondary building units (SBUs) constructed by dicarboxylic linkers and Eu ions.

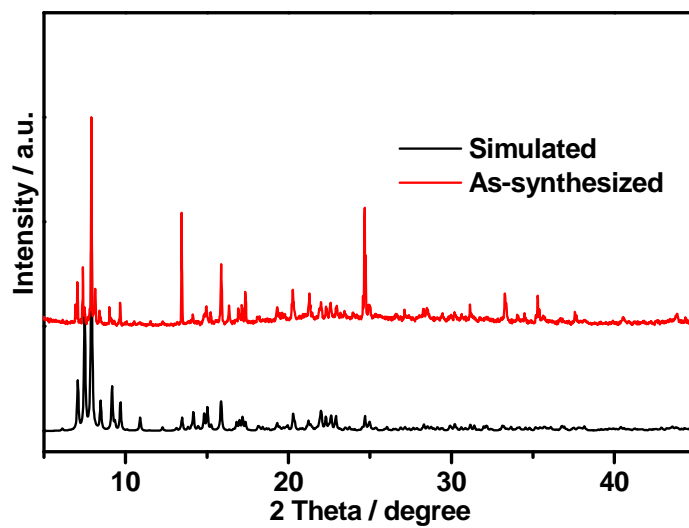

**Fig.S2** PXRD of 1.

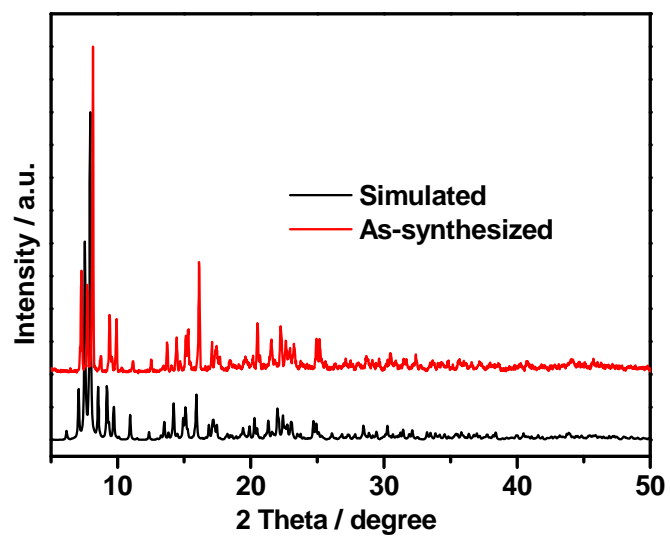

**Fig.S3** PXR D of **2**.

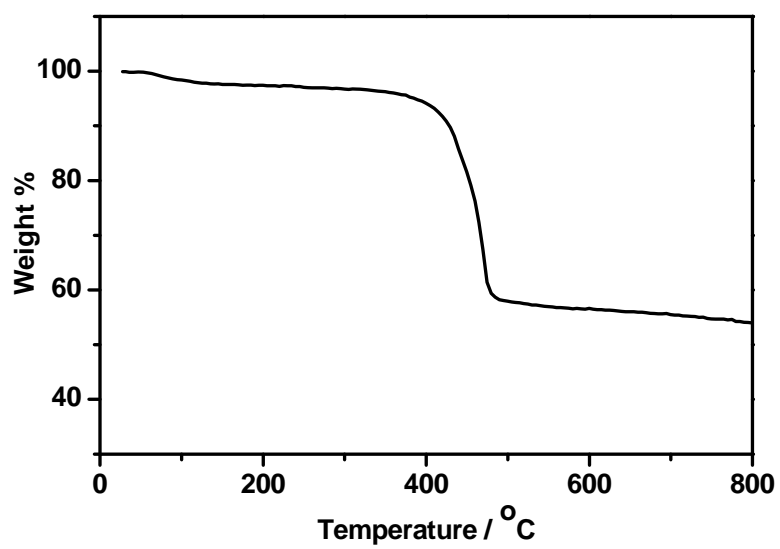

**Fig.S4** TG curve of **1a** in  $N_2$  environment.

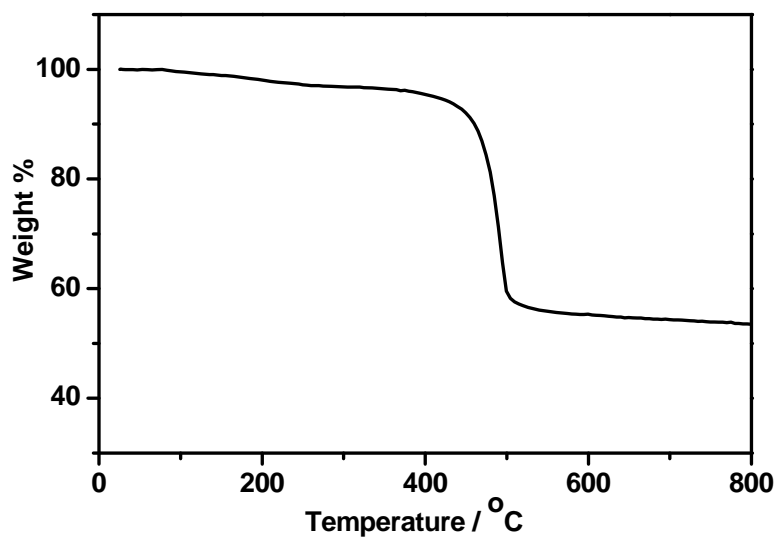

**Fig.S5** TG curve of **2a** in  $N_2$  environment.

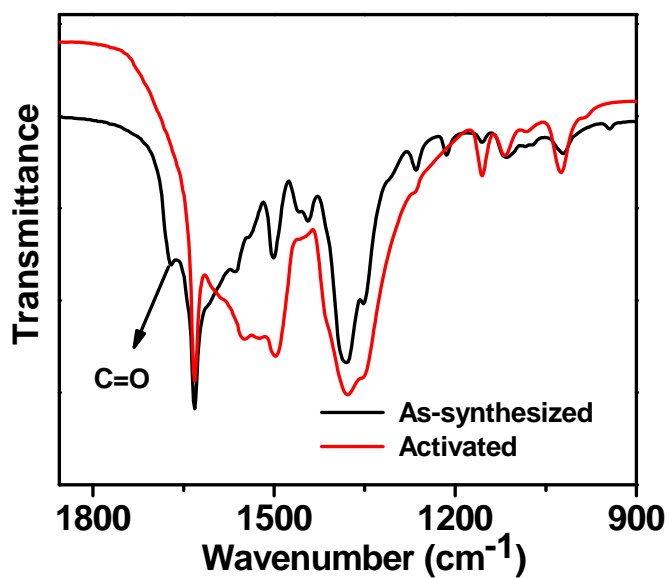

**Fig. S6** IR spectra of the as-synthesis and activated sample. The lack of C=O stretching peak at 1670  $cm^{-1}$  in the IR spectrum of activated **1** also confirms the full release of DEF guests.

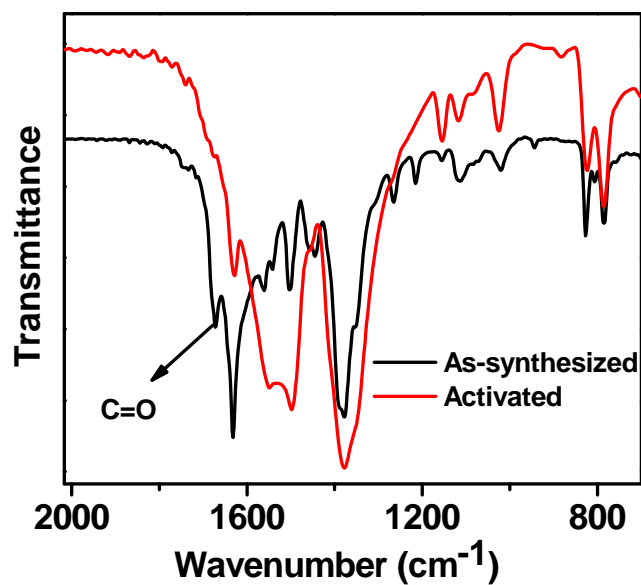

**Fig. S7** IR spectra of the as-synthesis and activated sample. The lack of C=O stretching peak at  $1671\text{ cm}^{-1}$  in the IR spectrum of activated **2** also confirms the full release of DEF guests.

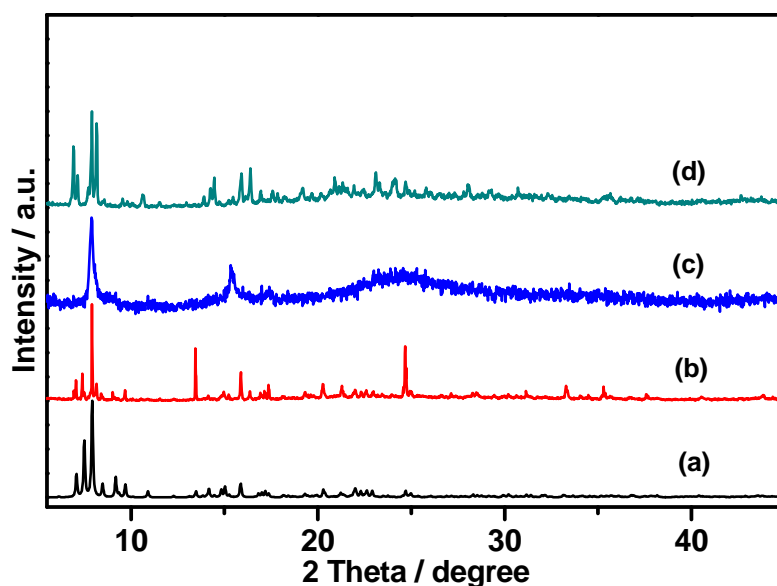

**Fig. S8** XRD of **1** in different conditions. (a) Simulated patterns by single-crystal X-ray diffraction; (b) As-synthesized patterns; (c) activated by methanol and dichloromethane exchange and then heating at  $140\text{ }^{\circ}\text{C}$  under vacuum for 4 hrs; (d) regenerated by soaking in DMF after activation.

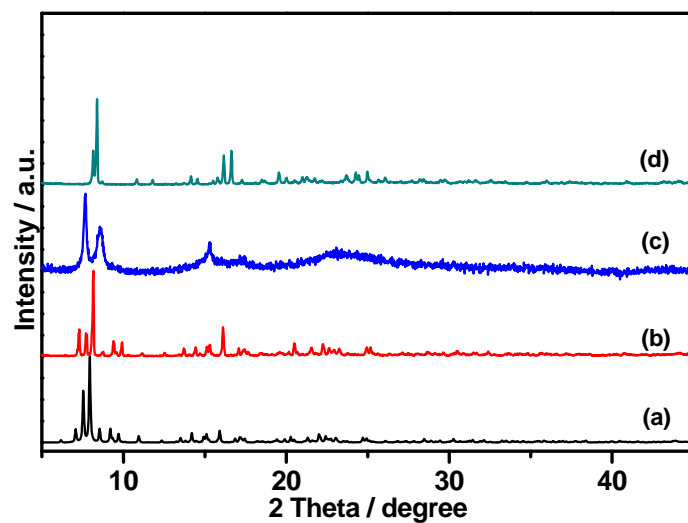

**Fig. S9** XRD of **2** in different conditions. (a) Simulated patterns by single-crystal X-ray diffraction; (b) As-synthesized patterns; (c) activated by methanol and dichloromethane exchange and then heating at 140 °C under vacuum for 4 hrs; (d) regenerated by soaking in DMF after activation.

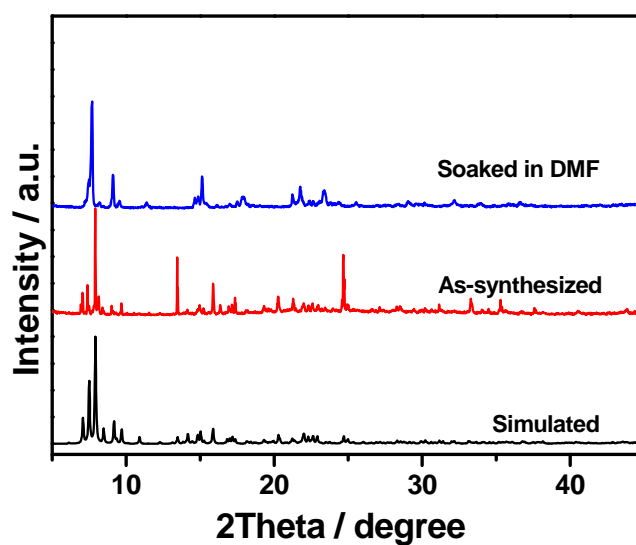

**Fig. S10** XRD of **1** soaked in DMF solvent.



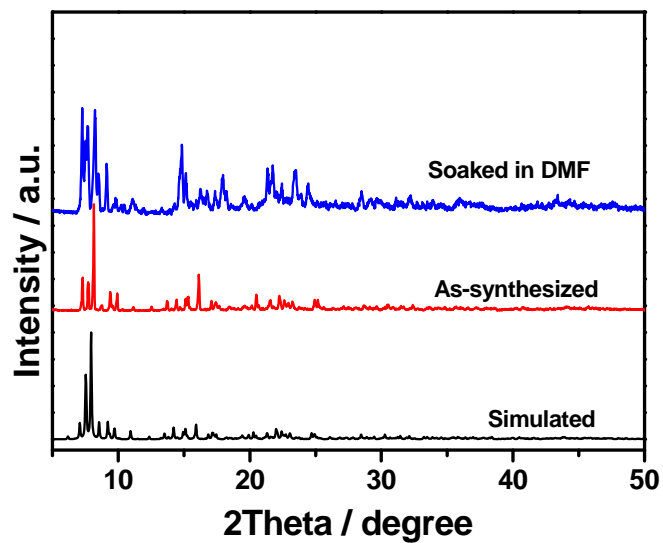

**Fig. S11** XRD of **2** soaked in DMF solvent.

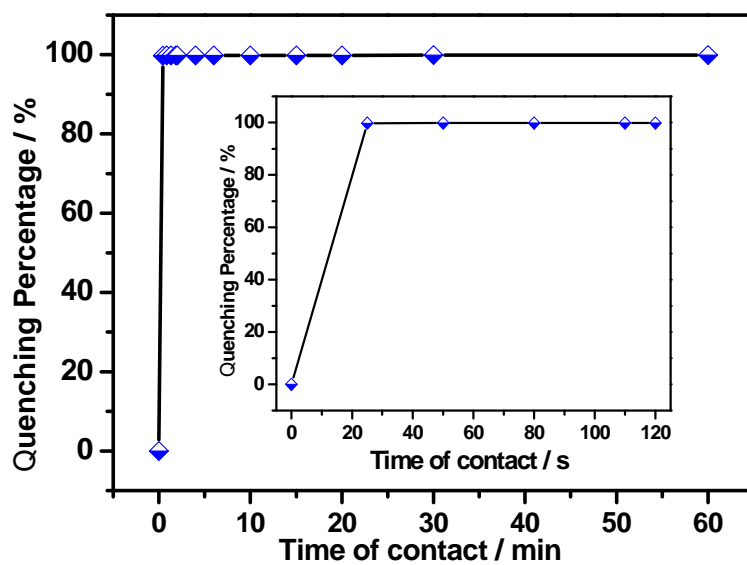

**Fig. S12** Time-dependent fluorescence quenching by nitrobenzene of **2**. Inset: [Time]  $\leq$  2 min.

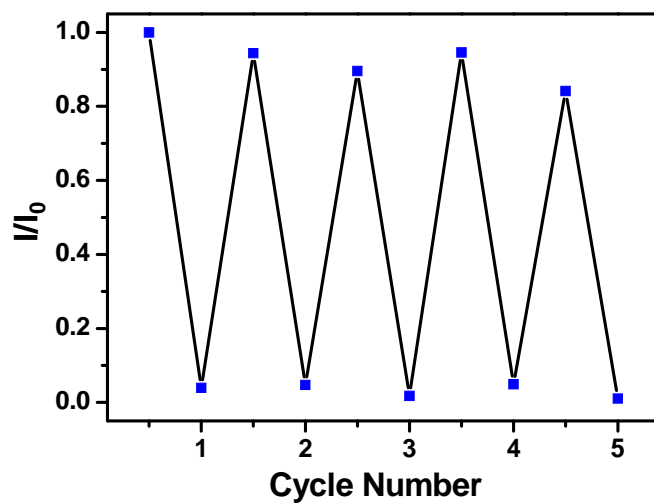

**Fig. S13** Recyclability tests of **2** in the presence of nitrobenzene.

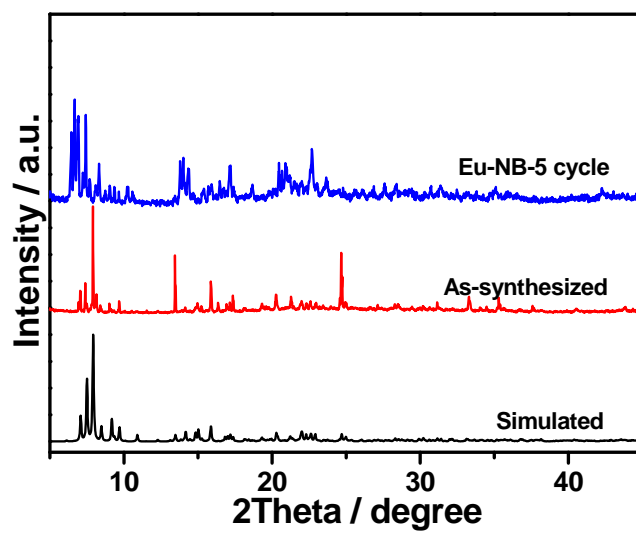

**Fig. S14** XRD of **1** after 5 cycles for sensing nitrobenzene.

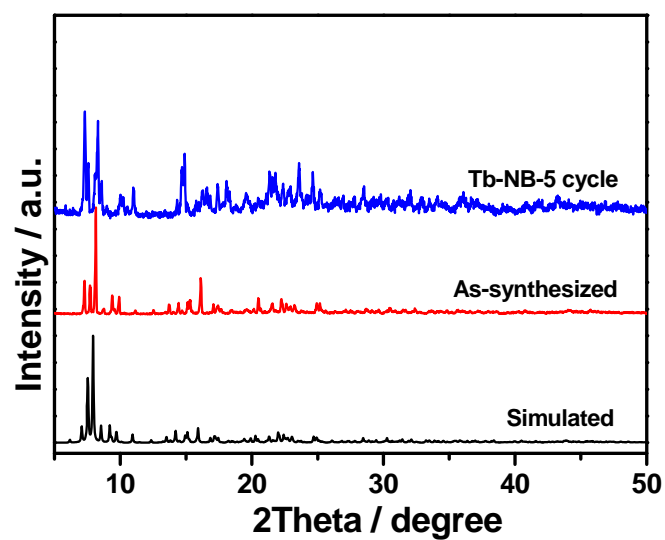

Fig. S15 XRD of **2** after 5 cycles for sensing nitrobenzene.

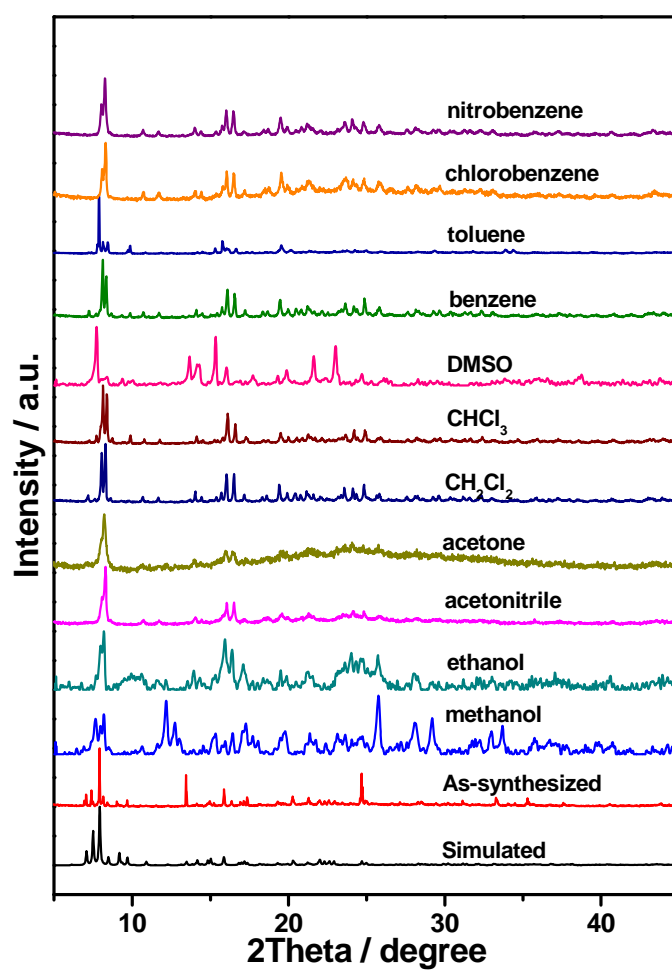

Fig. S16 PXRD of **1** after soaking in different solvents.

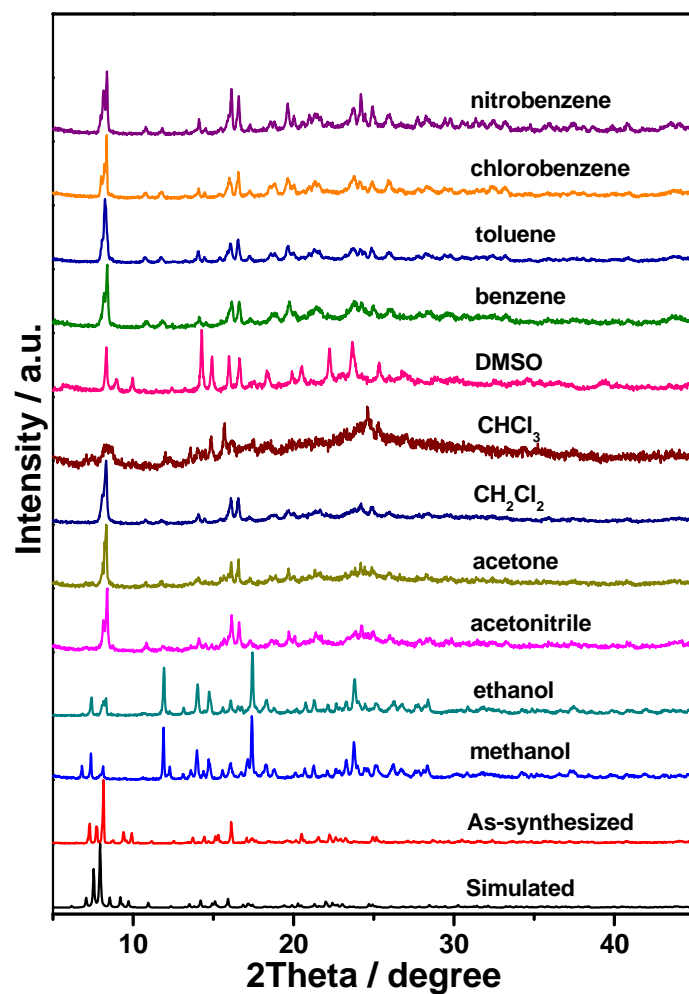

**Fig. S17** PXR D of **2** after soaking in different solvents.

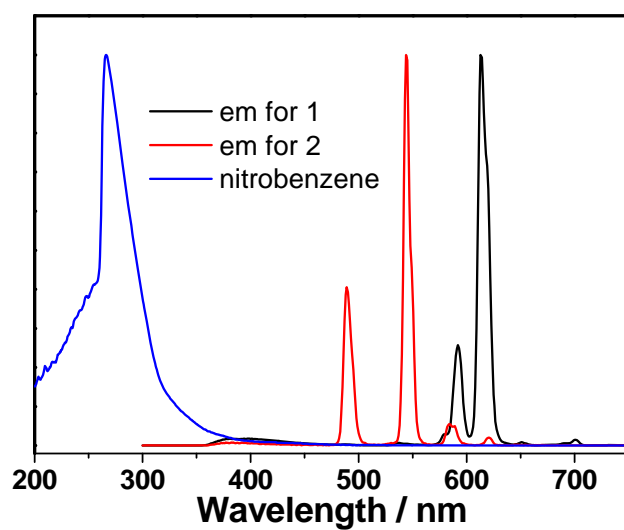

**Fig. S18** The emission spectra of **1** and **2** (dispersed in DMF) and UV-vis absorption spectrum of nitrobenzene (in DMF).

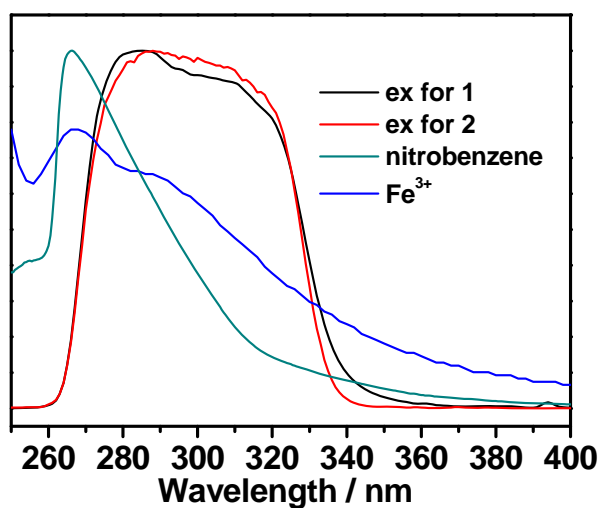

**Fig. S19** The excitation spectra of **1** and **2** (dispersed in DMF) and Uv-vis absorption spectrum of nitrobenzene and Fe(NO<sub>3</sub>)<sub>3</sub> in DMF.

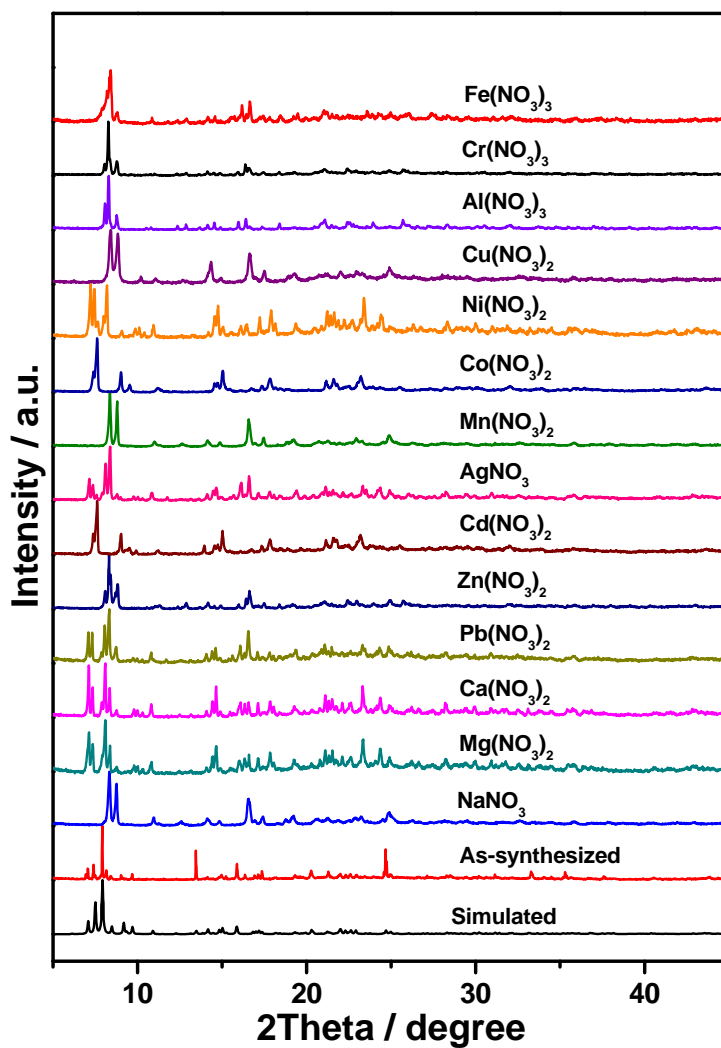

**Fig. S20** PXRD of **1** after soaking different metal ions in DMF

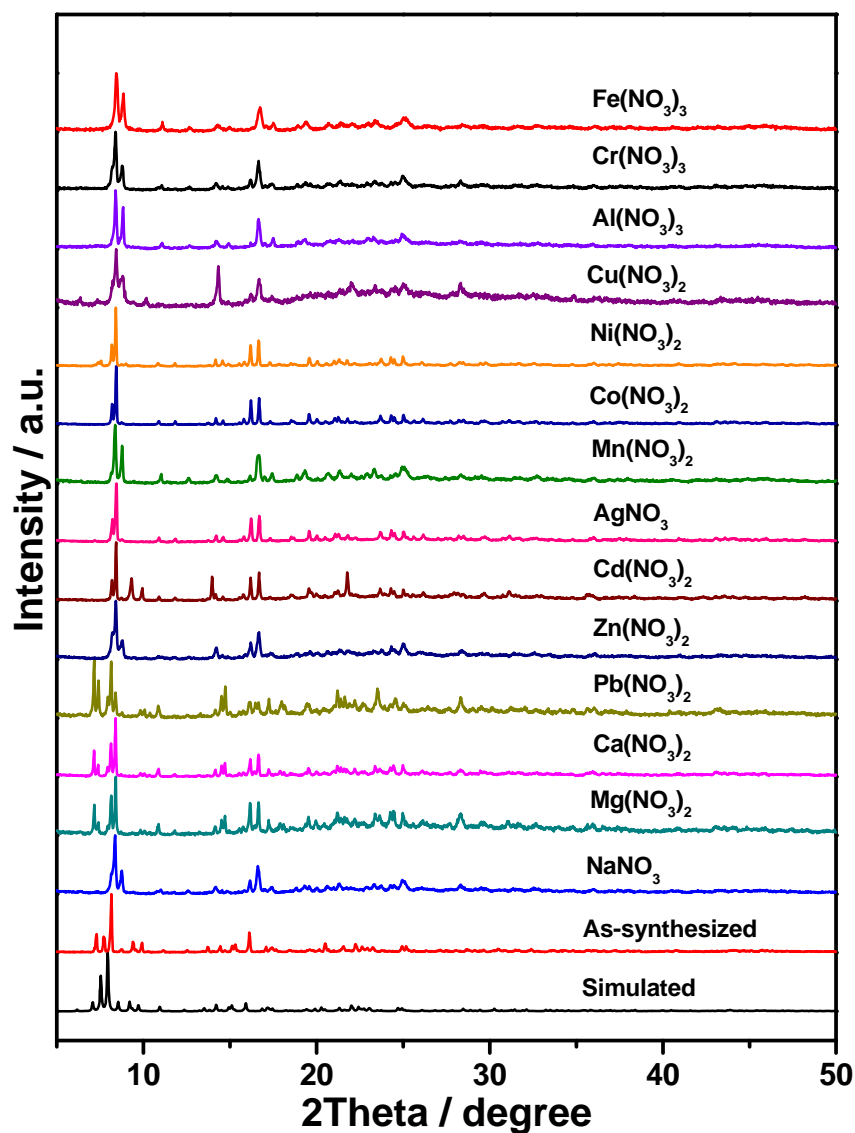

Fig. S21 PXRD of 2 after soaking different metal ions in DMF.

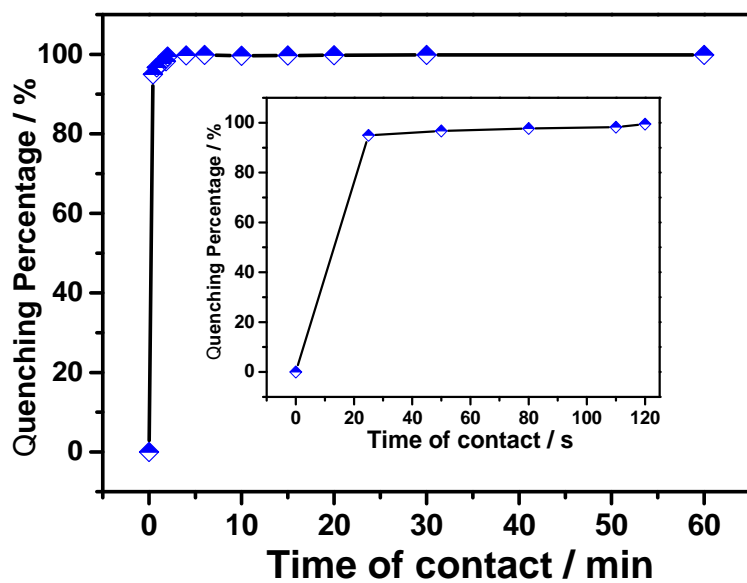

Fig. S22 Time-dependent fluorescence quenching by Fe<sup>3+</sup> of 2. Inset: [Time] ≤ 2 min.

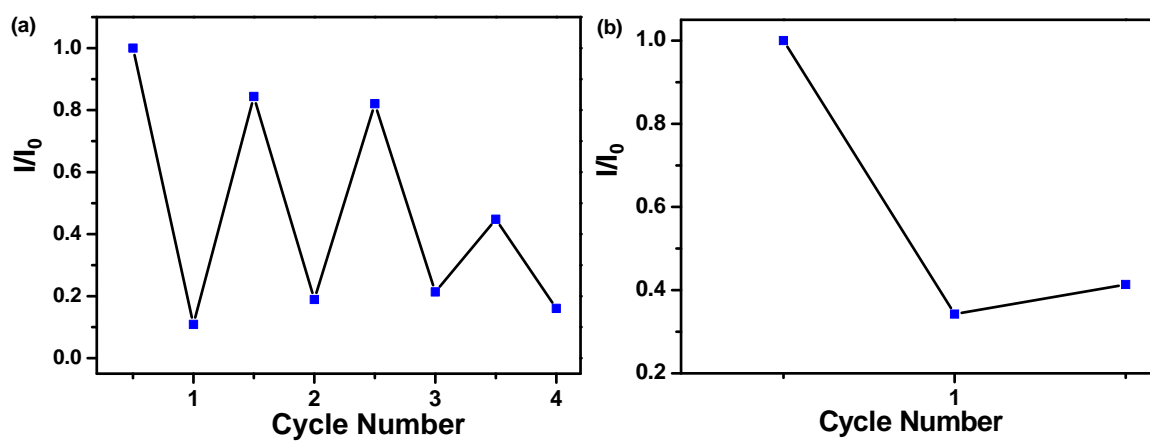

**Fig. S23** Recyclability tests for **1**(a) and **2** (b) in the presence of  $\text{Fe}^{3+}$  washed only with DMF.

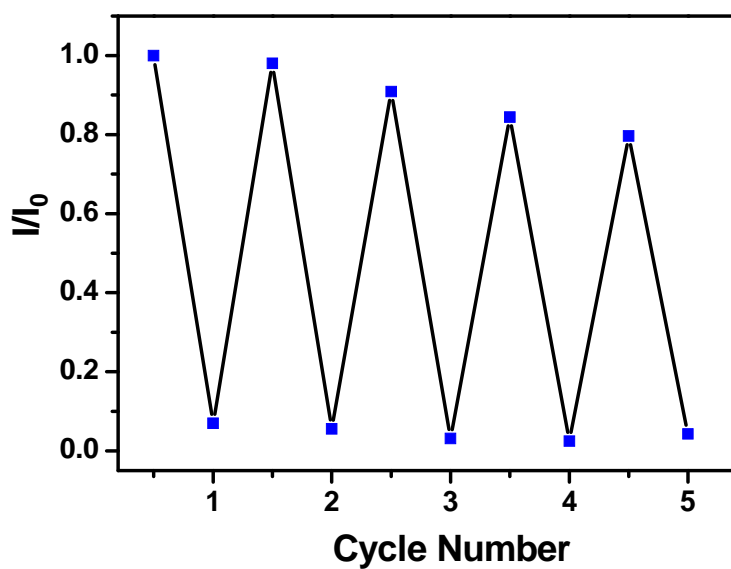

**Fig. S24** Recyclability tests of **2** in the presence of  $\text{Fe}^{3+}$ .

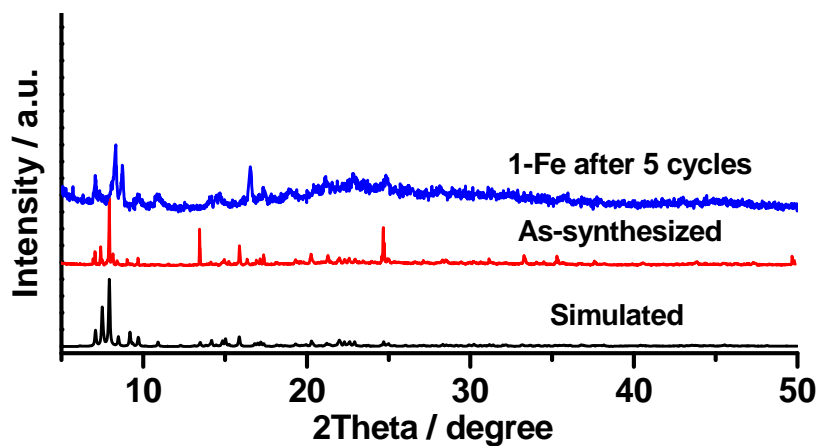

**Fig. S25** XRD of **1** after 5 cycles for sensing  $\text{Fe}^{3+}$ .

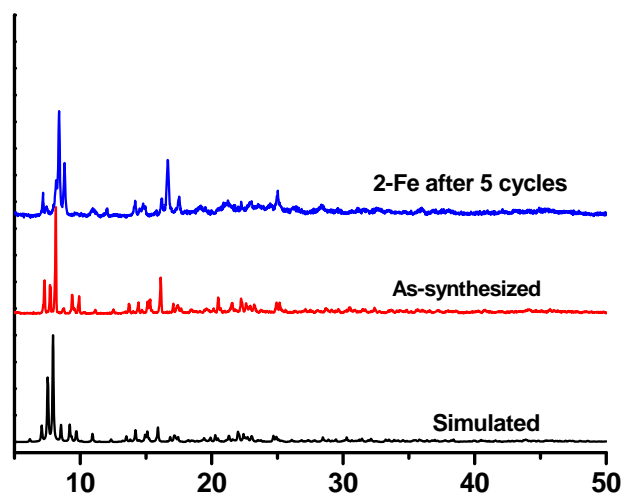

**Fig. S26** XRD of **1** after 5 cycles for sensing  $\text{Fe}^{3+}$ .

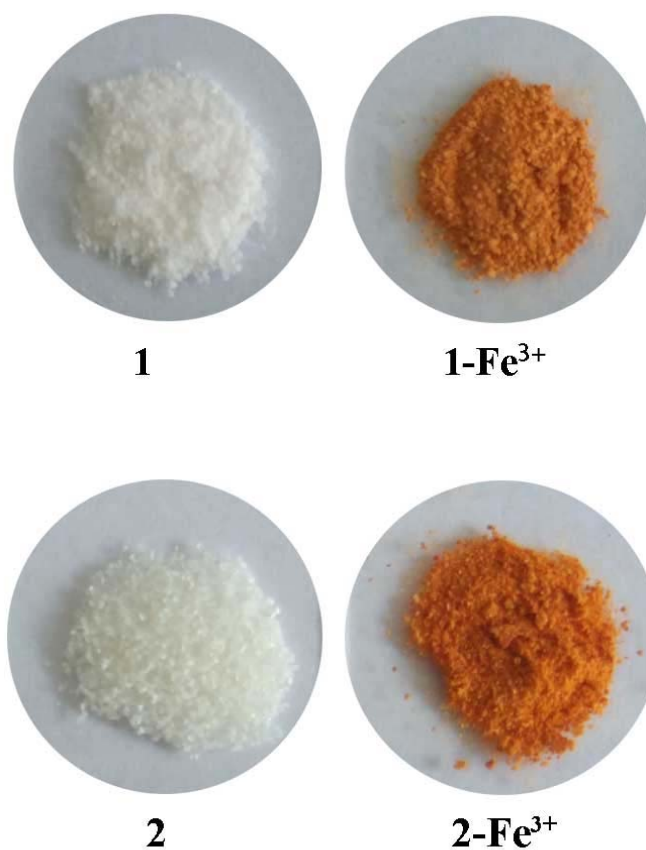

**Fig. S27** The photographs of **1**, **2** and  $\text{Fe}^{3+}$ -incorporated **1** and **2**.



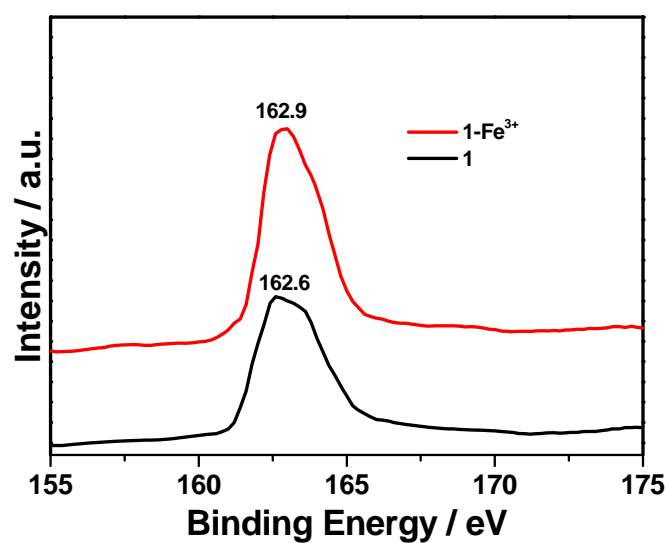

**Fig. S28** S2p XPS spectra of **1** before (black) and Fe<sup>3+</sup>-incorporated **1** (red).

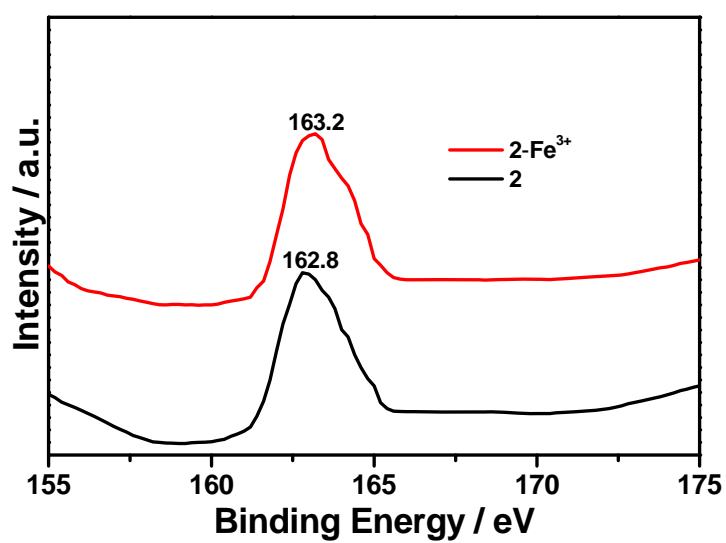

**Fig. S29** S2p XPS spectra of **2** before (black) and Fe<sup>3+</sup>-incorporated **2** (red).

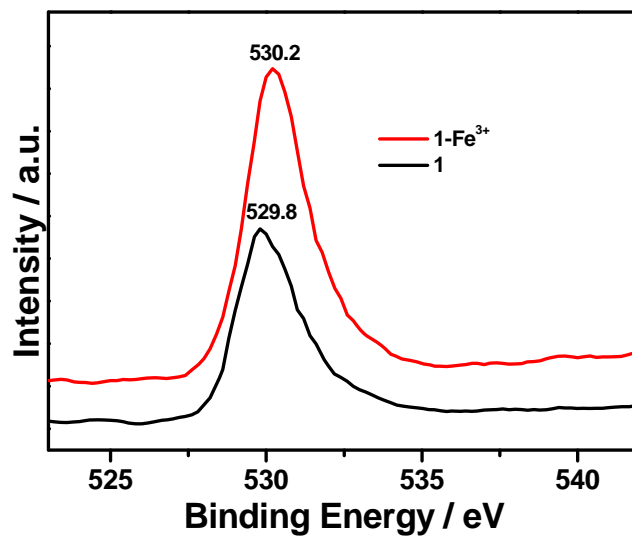

Fig. S30 O1s XPS spectra of **1** before and after immersed in Fe<sup>3+</sup>.

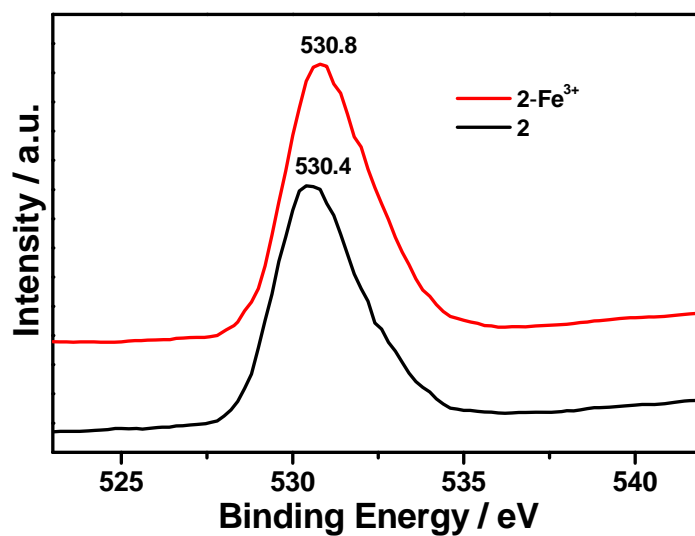

Fig. S31 O1s XPS spectra of **2** before (black) and Fe<sup>3+</sup>-incorporated **2** (red).
